# Supplementary material for: First synthesis of phosphatidylcholine and cholesteryl derivatives bearing an unsaturated aldehyde residue
Source: Royal Society of Chemistry journal article supplement (doi:10.1039/b206231n), 2002-01-01
Supplement: b206231n.doc [file b206231n.doc]

# Supplementary data

**First synthesis of phosphatidylcholine and cholesteryl derivatives bearing an unsaturated aldehyde residue**

**Arnold. N. Onyango,Teruhiko Nitoda, Takao Kaneko, Mitsuyoshi Matsuo, Shuhei Nakajima,and Naomichi Baba**

**HPOT methyl ester 5**

To a solution of -linolenic acid (1g, 3.5 mmol) in NH4OH (0.019 M, 380 ml) was added a solution of soybean lipoxygenase (40 mg, 4000000 units) in borate buffer (380 ml). This reaction mixture was stirred at 0-5C for 6 h while bubbling oxygen. It was then acidified to pH 5-6 with 1N HCl, and extracted with EtOAc . The organic fraction was washed with water, dried over Na2SO4 and concentrated in *vacuo*. The residue was reacted with excess diazomethane in diethyl ether to give a crude product which was chromatographed on silica gel (hexane-EtOAc, 9:1), affording compound **6** (600 mg, 53%). 1H NMR (500 MHZ, CDCl3):  0.92 (3H, t), 1.31(6H, m), 1.45(2H, m), 1.56(2H, m ), 2.03 (2H, m), 2.20(2H, m), 2.28(3H, m), 2.44(1 H, m), 3.66 (3H, s), 4.36 (1 H, m), 5.42( 3 H, m, ), 5.60 ( 1H, dd, *J* 7.9 and 15.3), 6.00 (1H , t, *J* 11.6), 6.54 (1H, dd, *J* 11.6, 15.3,)

**OTDA methyl esters 6 and 7 (mixture)**

13C NMR (200 MHz, CDCl3):  194.25 (C=O), 174.44 (COOR), 153.17 (C=C), 147.50 (C=C), 147.09(C=C), 144.13 (C=C), 131.90(C=C), 130.18 (C=C), 128.89 (C=C), 126.93 (C=C), 51.61 (C-O), 34.16, 29.28, 29.25, 29.17, 29.11, 28.61, 25.00 (The signals at 147.09, 144.13, 131.90 and 126.93 ppm are from compound **6** while those at 153.17, 147.50, 130.18 and 128.89 ppm are from compound **7**, based on comparison of spectra obtained from mixtures containing predominantly isomer **6** or **7**).

**OTDA isomers 8 and 9 (mixture)**

Rf = 0.2 (hexane-EtOAc, 4:1), 1H NMR (500 MHZ, CDCl3):  1.31 (6H, m), 1.45(2H, m), 1.59 (2H, m ), 2.03 (2H, m), 2.20-2.30 (4H, m), 6.00 (1 H, m), 6.07 (1 H, dd, *J* 7.9 and 15.2), 6.14 (I H, dd, *J* 7.9 and 15.2), 6.17-6.34 (3 H, m,), 7.08 (1H, dd, *J* 10.1 and 15.3), 7.44 (1H, dd, *J* 11.4 and 15.2), 9.52 ( 1H, d, *J* 7.9) , 9.61 ( 1H, d, J7.9); 13C NMR (200 MHz, CDCl3):  194.47 (C=O), 179.91 (COOH), 153.31 (C=C), 147.60 (C=C), 147.22(C=C), 144.23 (C=C), 131.93(C=C), 130.22 (C=C), 128.71 (C=C), 126.98 (C=C), 34.20, 29.22, 29.18, 29.15, 29.12, 28.61, 24.81;

# PC aldehydes 1 and 2

LysoPC (80 mg, 0.15 mmol), a mixture of water-free oxo-acids **8** and **9** (60 mg, 0.26 mmol) and DMAP (4 mg, 0.027 mmol) were dissolved in 1.5 ml ethanol-free chloroform. A solution of DCC (53mg, 0.26 mmol) in another 1.5 ml of ethanol-free chloroform was added, and the reaction mixture stirred under a nitrogen atmosphere for 20 h at room temperature. Purification of the product as described in the main text afforded a mixture of **1** and **3** as colourless resinous solids (98.8 mg, 90 % from lysoPC). Colouration with 2,4-dinitrophenylhydrazine confirmed the presence of the aldehyde group, while coluration with molybdenum blue confirmed the presence of phosphorus.  1H NMR and MS data are given in the main text. 13C NMR (200 MHz, CDCl3):  194.2 (C=O), 173.78 (COOR), 173.72 (COOR), 153.04 (C=C), 147.35(C=C), 147.01(C=C), 144.04(C=C), 132.00(C=C), 130.30 (C=C), 128.95 (C=C), 127.02 (C=C), 70.68 (glycerol C-2), 66.49 (CN), 63.61 (glycerol C-3), 63.17 (glycerol C-1), 59.52 (CO), 54.55 (NMe3), 34.45, 34.34, 33.36, 32.13, 29.94, 29.88, 29.79, 29.58, 29.42, 29.36, 29.29, 29.23, 29.19, 28.71, 28.59, 25.11, 25.05, 22.90, 14.33.

# Cholesteryl ester aldehydes 3 and 4

Following the procedure described for compounds 1 and 2, cholesterol (90 mg, 0.23 mmol) was reacted with a mixture of oxo acids 8 and 9 (52 mg, 0.23 mmol) in the presence of DCC (46 mg, 0.23 mmol) and DMAP (4 mg, 0.027mmol). The crude product was chromatographed on silica gel (hex-EtOAC, 9:1) to give **3** and **4** (118 mg, 87% yield). Separation of **3** and **4** was achieved on a longer column eluted with hex-EtOAC (9.5:5). **Compound 3** : 13C NMR (200 MHz, CDCl3):  193.85 (C=O), 173.14 (COOR), 146.69 (C=C), 143.83 (C=C), 139.62 (cholesterol C-5)), 131.75 (C=C), 126.70 (C=C), 122.58 (cholesterol C-6), 73.67 (cholesterol C-3), 56.63, 56.08, 49.97, 42.26, 39.68, 39.47, 38.12, 36.95, 36.55, 36.14, 35.75, 34.58, 33.12, 31.81, 28.97, 28.93, 28.43, 28.19, 27.97, 27.77, 24.91, 24.24, 23.78, 22.79, 22.53, 20.99, 19.28, 18.68, 11.82. **Compound 4**:  193.85 (C=O), 173.14 (COOR), 152.75 (C=C), 147.17 (C=C), 139.62 (cholesterol C-5), 130.03 (C=C), 128.66 (C=C), 122.58 (cholesterol C-6)), 73.67 (cholesterol C-3), 56.63, 56.08, 49.97, 42.26, 39.68, 39.47, 38.12, 36.95, 36.55, 36.14, 35.75, 34.58, 33.12, 31.81, 28.97, 28.93, 28.43, 28.19, 27.97, 27.77, 24.91, 24.24, 23.78, 22.79, 22.53, 20.99, 19.28, 18.68, 11.82
